# Supplementary material
Source: PubMed Central journal article supplement (PMC5247409)

## Appendix

**Table S1.** Adhesion Molecules Assays Characteristics.

| Protein (units)                                                                                                               | ELISA                                                                         | Minimal detectable level | Inter-assay coefficient of variation (%)                                       |
|-------------------------------------------------------------------------------------------------------------------------------|-------------------------------------------------------------------------------|--------------------------|--------------------------------------------------------------------------------|
| <i>Selectins: leukocytes and platelet adhesion to the endothelium</i>                                                         |                                                                               |                          |                                                                                |
| L-selectin (ng/mL)                                                                                                            | Human soluble L-Selectin/CD62L Immunoassay Kit (R&D Systems, Minneapolis, MN) | 0.3 ng/mL                | 6.7% at a mean concentration of 943 ng/mL for an in-house serum pooled control |
| P-selectin (ng/mL)                                                                                                            | Human soluble P-Selectin/CD62P Immunoassay Kit (R&D Systems, Minneapolis, MN) | 0.5 ng/mL                | 6.7% at a mean concentration of 182.1 ng/mL (Exam 2)                           |
| <i>Inter and intra-cellular adhesion proteins</i>                                                                             |                                                                               |                          |                                                                                |
| E-cadherin (ng/mL)                                                                                                            | Human E-Cadherin Quantikine ELISA Kit (R&D Systems, Minneapolis, MN)          | 0.039 ng/mL              | 7.8% at a mean concentration of 197 ng/mL                                      |
| ICAM-1 (ng/mL)                                                                                                                | Human sICAM-1 Instant ELISA (Bender MedSystems GmbH, Vienna, Austria)         | 2.17 ng/mL               | 9.1% at a mean concentration of 261 ng/mL                                      |
| VCAM-1 (ng/mL)                                                                                                                | Human sVCAM-1/CD106 Quantikine ELISA Kit (R&D Systems, Minneapolis, MN)       | 0.6 ng/mL                | 3.6% at a mean concentration of 564 ng/mL                                      |
| <i>Matrix metalloproteinases and protease inhibitors: plaque remodeling, cell mobilization, inflammatory markers cleavage</i> |                                                                               |                          |                                                                                |
| MMP-1 (ng/mL)                                                                                                                 | Human Pro-MMP-1 Quantikine ELISA Kit (R&D Systems, Minneapolis, MN)           | 0.021 ng/mL              | 3.5% at a mean concentration of 6.3 ng/mL                                      |
| MMP-2 (ng/mL)                                                                                                                 | Total MMP-2 Quantikine ELISA Kit (R&D Systems, Minneapolis, MN)               | 0.047 ng/mL              | 3.8% at a mean concentration of 186 ng/mL                                      |
| SLPI (pg/mL)                                                                                                                  | Human SLPI Quantikine ELISA Kit (R&D Systems, Minneapolis, MN)                | 25 pg/mL                 | 8.9% at a mean concentration of 36888 pg/mL                                    |
| TIMP-2 (ng/mL)                                                                                                                | Human TIMP-2 Quantikine ELISA Kit (R&D Systems, Minneapolis, MN)              | 0.011 ng/mL              | 4.7% at a mean concentration of 73.3 ng/mL                                     |
| <i>Chemokines and cytokine receptor: inflammatory cells homing to lymph nodes or inflammation sites</i>                       |                                                                               |                          |                                                                                |

|                                                          |                                                                              |            |                                                    |
|----------------------------------------------------------|------------------------------------------------------------------------------|------------|----------------------------------------------------|
| 6Ckine/CCL21 (pg/mL)                                     | Human CCL21/6Ckine Quantikine ELISA (R&D Systems, Minneapolis, MN)           | 9.9 pg/mL  | 5.6% at a mean concentration of 493 pg/mL          |
| IL-2sr (ng/mL)                                           | Human IL-2 sR alpha Quantikine ELISA (R&D Systems, Minneapolis, MN)          | 10 pg/mL   | 7.7% at a mean concentration of 653 ng/mL          |
| RANTES (pg/mL)                                           | Human CCL5/RANTES Quantikine ELISA Kit (R&D Systems, Minneapolis, MN)        | 2.0 pg/mL  | 10.0% at a mean concentration of 63287 pg/mL       |
| SDF-1 $\alpha$ (pg/mL)                                   | Human CXCL12/SDF-1 alpha Quantikine ELISA Kit (R&D Systems, Minneapolis, MN) | 18 pg/mL   | 11.40% at a mean concentration of 2228 pg/mL       |
| <i>Growth factors: cellular growth and proliferation</i> |                                                                              |            |                                                    |
| HGF (pg/mL)                                              | Human HGF Quantikine ELISA Kit (R&D Systems, Minneapolis, MN)                | 40 pg/mL   | 6.2% at a mean concentration of 946 pg/mL (Exam 2) |
| TGF $\beta$ -1 (pg/mL)                                   | Human TGF-beta 1 Quantikine ELISA Kit (R&D Systems, Minneapolis, MN)         | 4.61 pg/mL | 9.1% at a mean concentration of 32223 pg/mL        |

Abbreviations: ICAM-1, intercellular adhesions molecule 1; VCAM-1, vascular cell adhesion molecule 1; MMP-1, matrix metalloproteinase 1; MMP-2, matrix metalloproteinase 2; SLPI, secretory leukocyte protease inhibitor; TIMP-2, tissue inhibitor of metalloproteinases 2; CCL21, chemokine ligand 21; IL-2SR, Interleukin 2 soluble receptor; RANTES, regulated on activation normal T cell expressed and secreted; SDF-1 $\alpha$ , stromal derived factor 1 $\alpha$ ; HGF, hepatocyte growth factor; TGF $\beta$ -1, transforming growth factor.

**Table S2.** Unadjusted Mean  $\pm$  SD Protein Levels by ABI Category.

|                        | ABI $\leq$ 0.90     | 0.90 < ABI $\leq$ 1.00 | 1.00 < ABI $\leq$ 1.40 | <i>P</i> Value* |
|------------------------|---------------------|------------------------|------------------------|-----------------|
|                        | n = 79              | n = 182                | n = 2080               |                 |
| CCL-21, pg/mL          | 903 $\pm$ 271       | 901 $\pm$ 303          | 789 $\pm$ 271          | <0.001          |
| E-cadherin, ng/mL      | 239 $\pm$ 76        | 238 $\pm$ 82           | 222 $\pm$ 62           | 0.001           |
| HGF, pg/mL             | 1120 $\pm$ 292      | 1025 $\pm$ 240         | 973 $\pm$ 250          | < 0.001         |
| ICAM-1, ng/mL          | 267 $\pm$ 94        | 266 $\pm$ 114          | 258 $\pm$ 118          | 0.58            |
| IL-2sr, pg/mL          | 825 $\pm$ 480       | 801 $\pm$ 442          | 707 $\pm$ 328          | < 0.001         |
| L-selectin, ng/mL      | 802 $\pm$ 191       | 909 $\pm$ 208          | 895 $\pm$ 194          | < 0.001         |
| MMP-1, ng/mL           | 6.7 $\pm$ 4.7       | 6.1 $\pm$ 4.6          | 5.5 $\pm$ 4.2          | 0.02            |
| MMP-2, ng/mL           | 203 $\pm$ 30        | 196 $\pm$ 32           | 195 $\pm$ 31           | 0.12            |
| P-selectin, ng/mL      | 32 $\pm$ 9.6        | 30 $\pm$ 9.2           | 29 $\pm$ 9.2           | 0.002           |
| RANTES, pg/mL          | 4877 $\pm$ 4783     | 4958 $\pm$ 5,218       | 4211 $\pm$ 3892        | 0.03            |
| SDF-1 $\alpha$ , pg/mL | 2023 $\pm$ 536      | 1964 $\pm$ 455         | 1,935 $\pm$ 441        | 0.17            |
| SLPI, pg/mL            | 52,193 $\pm$ 13,175 | 48,669 $\pm$ 12,595    | 45,775 $\pm$ 10,457    | < 0.001         |
| TGF $\beta$ -1, pg/mL  | 4186 $\pm$ 2286     | 4290 $\pm$ 2498        | 3911 $\pm$ 2284        | 0.07            |
| TIMP-2, ng/mL          | 83 $\pm$ 12         | 82 $\pm$ 12            | 81 $\pm$ 13            | 0.11            |
| VCAM-1, ng/mL          | 737 $\pm$ 219       | 782 $\pm$ 223          | 728 $\pm$ 222          | 0.01            |

\**P* Values calculated by ANOVA.

Abbreviations as in Table S1.

**Table S3.** Cellular Adhesion Protein Correlations (Pearson coefficients).

| <b>Protein</b>                  | <b>MMP-1</b> | <b>P-selectin</b> | <b>TIMP-2</b> | <b>CCL-21</b> | <b>HGF</b> | <b>MMP-2</b> | <b>SLPI</b> | <b>SDF-1<math>\alpha</math></b> | <b>TGF<math>\beta</math>-1</b> | <b>RANTES</b> | <b>VCAM-1</b> | <b>E-cadherin</b> | <b>L-selectin</b> | <b>ICAM-1</b> | <b>IL-2sr</b> |
|---------------------------------|--------------|-------------------|---------------|---------------|------------|--------------|-------------|---------------------------------|--------------------------------|---------------|---------------|-------------------|-------------------|---------------|---------------|
| <b>MMP-1</b>                    | 1.00         | 0.13              | -0.05         | 0.07          | 0.07       | -0.06        | 0.05        | 0.00                            | 0.12                           | 0.11          | 0.01          | 0.04              | -0.04             | 0.02          | 0.00          |
|                                 | -            | 0.00              | 0.18          | 0.09          | 0.08       | 0.13         | 0.18        | 1.00                            | 0.00                           | 0.01          | 0.89          | 0.28              | 0.38              | 0.66          | 0.92          |
| <b>P-selectin</b>               |              | 1.00              | -0.06         | 0.01          | 0.22       | -0.10        | 0.11        | -0.05                           | 0.06                           | 0.11          | 0.02          | 0.09              | -0.03             | 0.16          | 0.10          |
|                                 |              | -                 | 0.16          | 0.78          | <0.001     | 0.02         | 0.02        | 0.26                            | 0.12                           | 0.01          | 0.59          | 0.02              | 0.40              | <0.001        | 0.02          |
| <b>TIMP-2</b>                   |              |                   | 1.00          | 0.16          | 0.25       | 0.76         | 0.07        | 0.29                            | -0.05                          | -0.03         | 0.35          | 0.16              | 0.08              | 0.12          | 0.12          |
|                                 |              |                   | -             | <0.001        | <0.001     | <0.001       | 0.08        | <0.001                          | 0.19                           | 0.50          | <0.001        | <0.001            | 0.05              | 0.00          | 0.00          |
| <b>CCL-21</b>                   |              |                   |               | 1.00          | 0.31       | 0.12         | 0.30        | 0.26                            | 0.09                           | 0.06          | 0.33          | 0.23              | 0.09              | 0.22          | 0.30          |
|                                 |              |                   |               | -             | <0.001     | 0.00         | <0.001      | <0.001                          | 0.03                           | 0.12          | <0.001        | <0.001            | 0.03              | <0.001        | <0.001        |
| <b>HGF</b>                      |              |                   |               |               | 1.00       | 0.13         | 0.23        | 0.25                            | 0.15                           | 0.16          | 0.40          | 0.28              | 0.10              | 0.42          | 0.29          |
|                                 |              |                   |               |               | -          | 0.00         | <0.001      | <0.001                          | 0.00                           | <0.001        | <0.001        | <0.001            | 0.02              | <0.001        | <0.001        |
| <b>MMP-2</b>                    |              |                   |               |               |            | 1.00         | 0.06        | 0.25                            | -0.06                          | -0.04         | 0.27          | 0.10              | 0.01              | 0.06          | 0.00          |
|                                 |              |                   |               |               |            | -            | 0.17        | <0.001                          | 0.11                           | 0.39          | <0.001        | 0.01              | 0.76              | 0.16          | 0.92          |
| <b>SLPI</b>                     |              |                   |               |               |            |              | 1.00        | 0.16                            | 0.13                           | 0.17          | 0.29          | 0.28              | 0.03              | 0.19          | 0.26          |
|                                 |              |                   |               |               |            |              | -           | 0.00                            | 0.00                           | <0.001        | <0.001        | <0.001            | 0.50              | <0.001        | <0.001        |
| <b>SDF-1<math>\alpha</math></b> |              |                   |               |               |            |              |             | 1.00                            | 0.04                           | 0.07          | 0.45          | 0.04              | 0.15              | 0.12          | 0.23          |
|                                 |              |                   |               |               |            |              |             | -                               | 0.35                           | 0.06          | <0.001        | 0.29              | 0.00              | 0.00          | <0.001        |
| <b>TGF<math>\beta</math>-1</b>  |              |                   |               |               |            |              |             |                                 | 1.00                           | 0.76          | 0.11          | 0.11              | -0.07             | 0.06          | 0.07          |
|                                 |              |                   |               |               |            |              |             |                                 | -                              | <0.001        | 0.01          | 0.01              | 0.09              | 0.16          | 0.07          |
| <b>RANTES</b>                   |              |                   |               |               |            |              |             |                                 |                                | 1             | 0.11          | 0.11              | -0.07             | 0.07          | 0.09          |
|                                 |              |                   |               |               |            |              |             |                                 |                                | -             | 0.009         | 0.009             | 0.09              | 0.07          | 0.02          |
| <b>VCAM-1</b>                   |              |                   |               |               |            |              |             |                                 |                                |               | 1             | 0.43              | 0.31              | 0.47          | 0.50          |
|                                 |              |                   |               |               |            |              |             |                                 |                                |               | -             | <0.001            | <0.001            | <0.001        | <0.001        |
| <b>E-cadherin</b>               |              |                   |               |               |            |              |             |                                 |                                |               |               | 1                 | 0.04              | 0.30          | 0.37          |
|                                 |              |                   |               |               |            |              |             |                                 |                                |               |               | -                 | 0.33              | <0.001        | <0.001        |
| <b>L-selectin</b>               |              |                   |               |               |            |              |             |                                 |                                |               |               |                   | 1                 | 0.27          | 0.25          |
|                                 |              |                   |               |               |            |              |             |                                 |                                |               |               |                   | -                 | <0.001        | <0.001        |
| <b>ICAM-1</b>                   |              |                   |               |               |            |              |             |                                 |                                |               |               |                   |                   | 1             | 0.40          |
|                                 |              |                   |               |               |            |              |             |                                 |                                |               |               |                   |                   | -             | <0.001        |
| <b>IL-2sr</b>                   |              |                   |               |               |            |              |             |                                 |                                |               |               |                   |                   |               | 1             |
|                                 |              |                   |               |               |            |              |             |                                 |                                |               |               |                   |                   |               | -             |

Figure S1. Subject Selection.

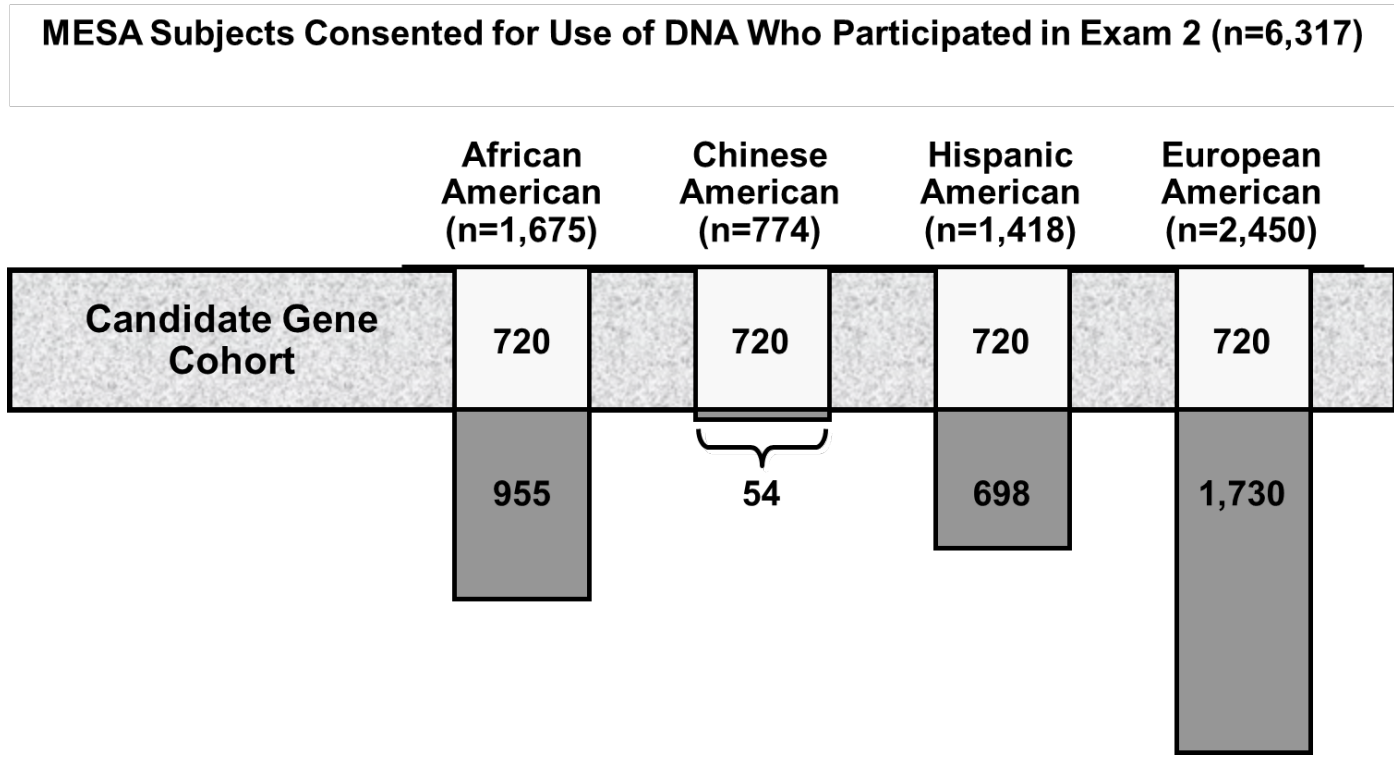

Supplement: NIHMS813612-supplement-Tables_1-3.pdf [file NIHMS813612-supplement-Tables_1-3.pdf]
